# Supplementary material for: The TensorMol-0.1 model chemistry: a neural network augmented with long-range physics
Source: PubMed Central journal article supplement — Chem Sci. 2018 Jan 18;9(8):2261–9. doi: 10.1039/c7sc04934j (PMC5897848; doi:10.1039/c7sc04934j), 2018-01-18
Supplement: SC-009-C7SC04934J-s001.pdf [file SC-009-C7SC04934J-s001.pdf]

**Supplementary Information:**

**The TensorMol0.1 Model Chemistry: a Neural Network Augmented with  
Long-Range Physics.**

Kun Yao,<sup>1</sup> John E. Herr,<sup>1</sup> David W. Toth,<sup>1</sup> Ryker Mckintyre,<sup>1</sup> and John Parkhill<sup>1, a)</sup>

*Dept. of Chemistry and Biochemistry, The University of Notre Dame du Lac*

(Dated: 31 December 2017)

---

<sup>a)</sup>Electronic mail: [jparkhil@nd.edu](mailto:jparkhil@nd.edu)

## I. Baseline

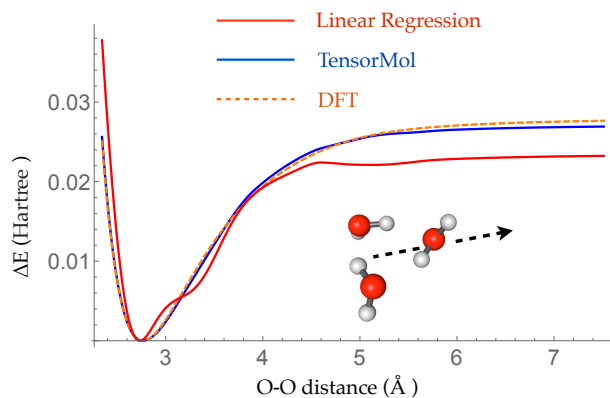

FIG. S1. Harmonic IR spectrum of morphine simulated by  $\omega$ B97X-D/6-311G\*\* (dashed orange line) and linear regression over symmetry functions (solid yellow line).

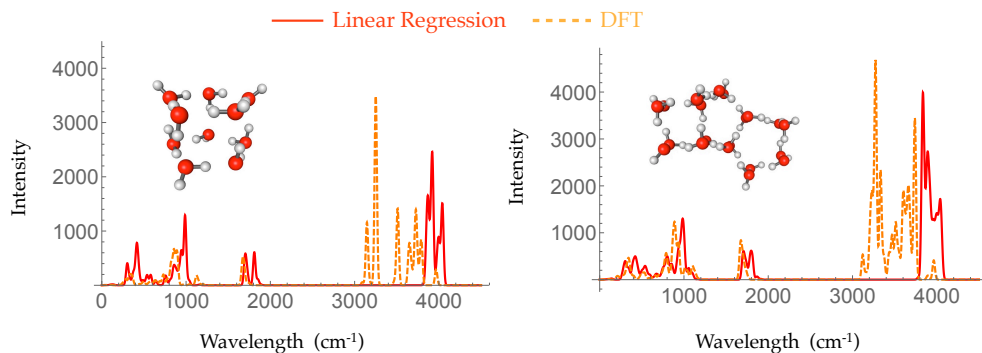

FIG. S2. Harmonic IR spectrum 10 water cluster (left panel) and 20 water cluster (right panel) simulated by  $\omega$ B97X-D/6-311G\*\* (dashed orange line) and linear regression over symmetry functions (solid red line). The MAE of the linear regression frequencies is  $132.5 \text{ cm}^{-1}$  for 10 water cluster and  $133.0 \text{ cm}^{-1}$  for 20 water cluster

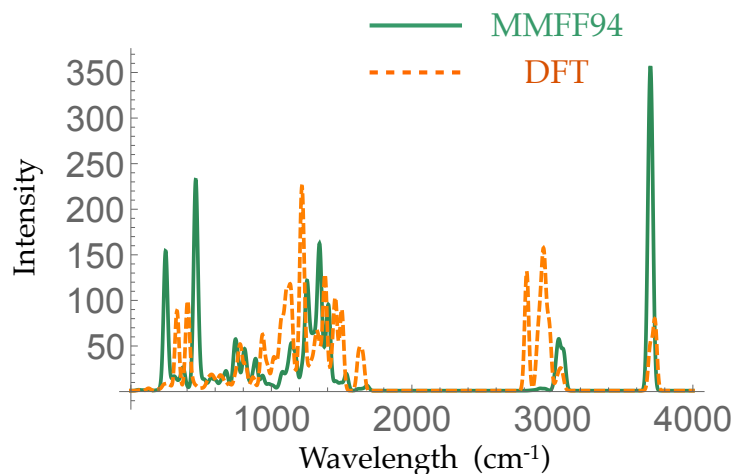

FIG. S3. Harmonic IR spectrum of morphine simulated by  $\omega$ B97X-D/6-311G\*\* (dashed orange line) and MMFF94 functions (solid green line). MMFF94 frequencies are calculated using RDKit<sup>1</sup>. The DFT frequencies are scaled by a scalar factor of 0.957<sup>2</sup>. The MAE of MMFF94 frequencies is 28.4  $cm^{-1}$

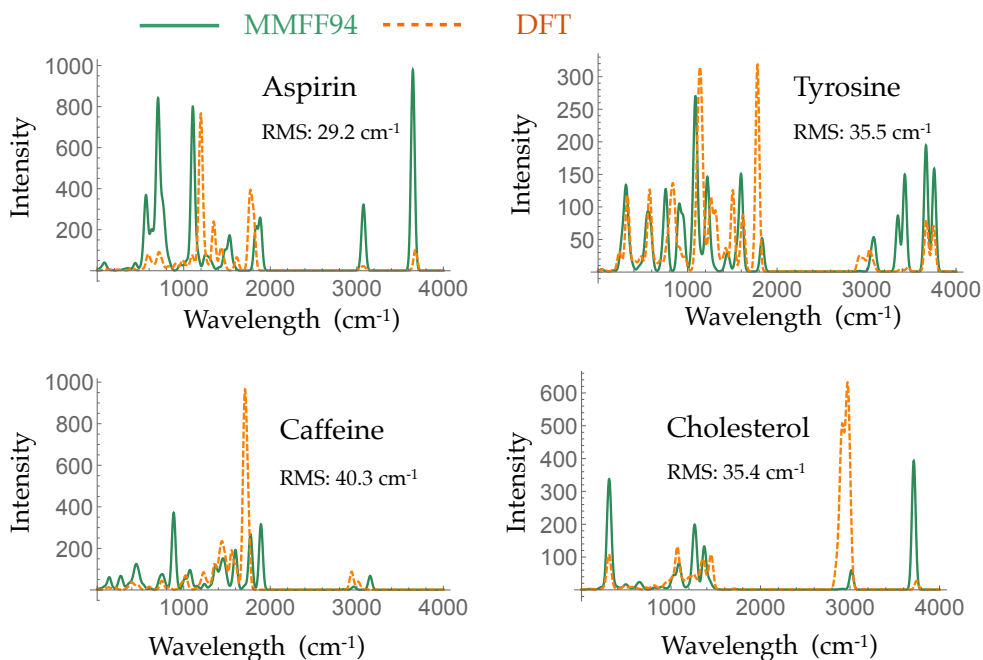

FIG. S4. Harmonic IR spectrum of four different molecules simulated by  $\omega$ B97X-D/6-311G\*\* (dashed orange line) and MMFF94 (solid green line). MMFF94 frequencies are calculated using RDKit<sup>1</sup>. The DFT frequencies are scaled by a scalar factor of 0.957<sup>2</sup>.

## II. Water hexamer cluster and geometry optimization with/without electrostatic energy

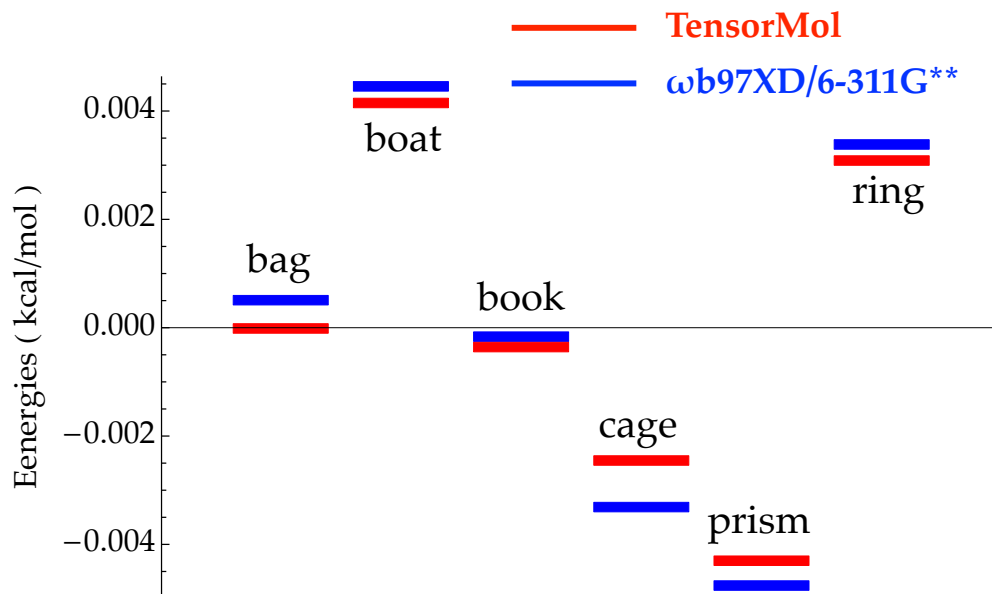

FIG. S5. Relative energies of different conformers of water hexamer cluster<sup>3</sup>. TensorMol predicts the same order of energies as the target method,  $\omega$ B97X-D/6-311G\*\* and the MAE of the relative energies predicted by TensorMol is 0.44 kcal/mol.

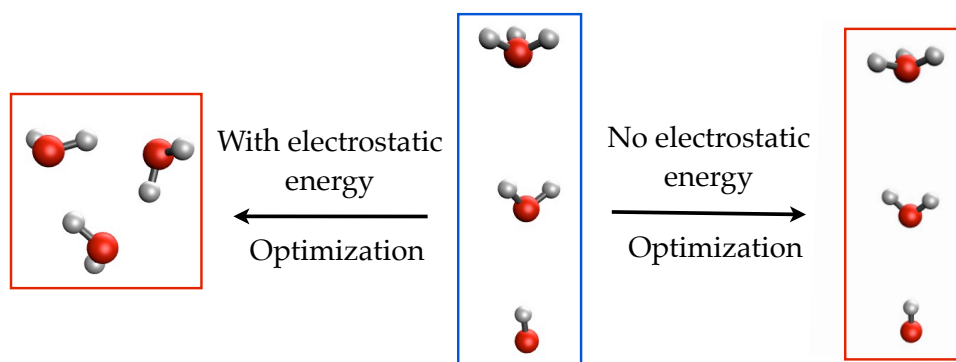

FIG. S6. Geometry optimization of a water trimer that contains  $OH^-$  and  $H_3O^+$ . The neural network that includes electrostatic interaction successfully bring the cluster to the correct global minimal while the one that does not consider electrostatic interaction is stuck at local minimal because of the lack of long range interaction.

### III. Hyperparamters Search

TABLE S1. Test RMSE of each learning target for water networks trained with different hyperparameters. The unit of energy RMSE, gradient RMSE and dipole RMSE is kcal/mol per atom, kcal/mol/Å per atom and Debye per atom, respectively

| Hidden layers | Neurons per layer | Act. function               | Energy | Gradient | Dipole |
|---------------|-------------------|-----------------------------|--------|----------|--------|
| 3             | 500               | Softplus ( $\alpha = 100$ ) | 0.054  | 0.49     | 0.0082 |
| 3             | 100               | Softplus ( $\alpha = 100$ ) | 0.058  | 0.56     | 0.0090 |
| 3             | 200               | Softplus ( $\alpha = 100$ ) | 0.059  | 0.52     | 0.0086 |
| 3             | 1000              | Softplus ( $\alpha = 100$ ) | 0.066  | 0.48     | 0.0082 |
| 1             | 500               | Softplus ( $\alpha = 100$ ) | 0.065  | 0.69     | 0.0086 |
| 2             | 500               | Softplus ( $\alpha = 100$ ) | 0.093  | 0.54     | 0.0085 |
| 4             | 500               | Softplus ( $\alpha = 100$ ) | 0.054  | 0.50     | 0.0083 |
| 3             | 500               | Softplus ( $\alpha = 10$ )  | 0.089  | 0.80     | 0.0090 |
| 3             | 500               | Softplus ( $\alpha = 1$ )   | 0.61   | 3.4      | 0.011  |
| 3             | 500               | Tanh                        | 0.24   | 1.1      | 0.010  |
| 3             | 500               | Sigmoid                     | 0.38   | 2.6      | 0.011  |
| 3             | 500               | Guassian                    | 0.075  | 0.66     | 0.0098 |

### IV. Timing

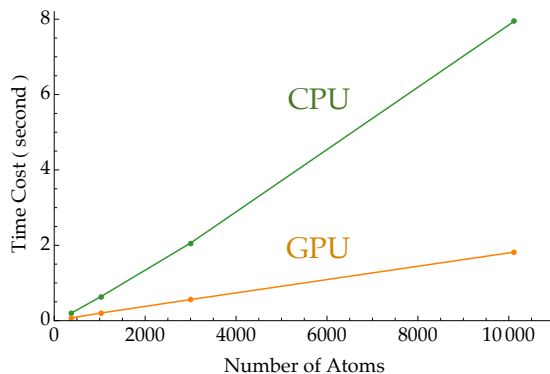

FIG. S7. Aperiodic timings of an energy, charge, force call for cubic water clusters at a density of 1 gm/cm without considering neighbor list building which is not implemented in GPU yet. The GPU timing is measured on single Nvidia K40 GPU and CPU timing is measured on a 8 thread Intel Xeon CPU E5-1620 v2. The GPU is 3 times to 4 times faster than CPU per call.

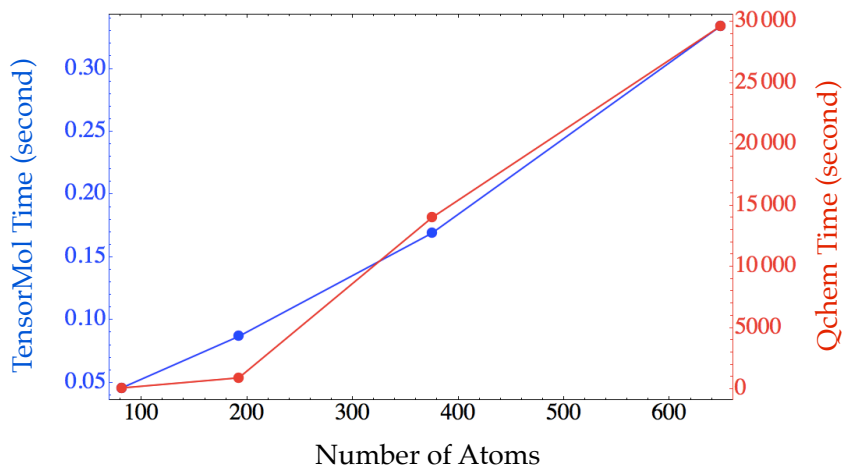

FIG. S8. Timing of TensorMol force field and Qchem for different size of water clusters. The GPU timing is measured on single Nvidia K40 CPU and CPU timing is measure on two 16 thread Intel Xeon CPU E5-2667 v4.

## V. Datasets

Both water datasets and chemspider datasets are available at [https://drive.google.com/drive/folders/1IfWPs7i5kfmErIRyuhGv95dSVtNFo0e\\_?usp=sharing](https://drive.google.com/drive/folders/1IfWPs7i5kfmErIRyuhGv95dSVtNFo0e_?usp=sharing). To load the datasets, copy the \*.pdb file to the "./datasets" folder, using following script to view the datasets.

```
a = MSet("chemspider12_clean_maxatom35") # for chemspider network
#a = MSet("H2O_wb97xd_1to21_with_prontonated") # for water network
a.Load()
for mol in a.mols:
    print (mol.coords, mol.atoms, mol.properties)
```

## VI. Procedures of using TensorMol0.1

- Install Tensorflow, Python.
- Download TensorMol from <https://github.com/jparkhill/TensorMol>. Checkout master branch. Download the trained water network and chemspider network from [https://drive.google.com/drive/folders/1IfWPs7i5kfmErIRyuhGv95dSVtNFo0e\\_?usp=sharing](https://drive.google.com/drive/folders/1IfWPs7i5kfmErIRyuhGv95dSVtNFo0e_?usp=sharing). Copy the trained networks (network.tar.bz2) into TensorMol folder. Unzip trained networks.

- Copy the test script [test\\_tensormol01.py](#) in folder `./samples` to into the Tensormol folder. Run the script test the geometry optimization, molecular dynamic, harmonic IR spectrum and realtime IR spectrum.
- Demo of training a neural network force field using TensorMol: Copy the training script [training\\_sample.py](#) into the tensormol folder. Run the script. This will train a network force field for water.

## VII. XYZ of Morphine and 10 water cluster

40

Comment: morphine

```

C   -0.26128864264   -2.75777726029   0.853585170695
C   -1.5731577245   -2.9331214008   0.438597292241
C   -2.28783536382   -1.90359422499   -0.174056162063
C   -1.60675107221   -0.720684675887   -0.397707544461
C   -1.05885310175   1.45422839253   -0.87996473547
C   -1.37934163468   2.51495028937   0.18555012868
C   -0.994593859686   2.0096024107   1.56217625666
C   0.207845084401   1.4778667849   1.75826057187
C   2.23312771495   0.21623088604   0.843421285889
C   1.75697954809   -1.2106173412   1.19755022153
C   0.405861195872   -1.55167473654   0.628798710766
C   -0.264287220653   -0.639282633463   -0.153523501842
C   0.260061289681   0.681799321679   -0.587581030167
C   1.09631637014   1.22119060851   0.574973727893
C   1.14465054951   0.602799716836   -1.82847073625
C   2.42196487767   -0.1950960018   -1.55504427211
C   4.41665573803   -0.301410817383   -0.163494885385
O   -3.57784584995   -2.08142645743   -0.509105514634
O   -2.7261830319   2.88856809595   0.1105939134
O   -2.13654226164   0.458725543352   -0.8204936497
N   3.08636691844   0.250896158649   -0.337245552508
H   0.230321332519   -3.57422440962   1.36953282915

```

H -2.07863974118 -3.87663230172 0.610582560046  
H -1.0856978507 1.91077278592 -1.86398278382  
H -0.779006714497 3.40909210108 -0.0304774509977  
H -1.69917069508 2.17224020205 2.36455233088  
H 0.552920535637 1.23754632997 2.75341805043  
H 2.82189961453 0.598923188177 1.67726907999  
H 2.48045519306 -1.93243664483 0.813520005582  
H 1.74042618376 -1.35446085791 2.28267687069  
H 1.57670373336 2.15015129495 0.247450380732  
H 0.591190495438 0.157195222901 -2.65425989337  
H 1.41092229804 1.62795751438 -2.10674556104  
H 2.18868725402 -1.27195036279 -1.50715561626  
H 3.1147653044 -0.0621217571847 -2.38767702983  
H 5.04635367629 0.012651048409 -1.00011486156  
H 4.43727603061 -1.40116877603 -0.128010221059  
H 4.86256552386 0.0833435016803 0.75675528593  
H -3.9029405557 -1.26425773557 -0.895167792724  
H -3.22326677646 2.07816903532 -0.0396507665797

30

Comment: water\_10

O -0.803145962132 -2.32393801483 1.16375849822  
H -1.18462906878 -3.05755112744 1.64596595709  
H -1.41094425413 -1.55728862437 1.26122589388  
O 1.76316446851 -1.35483999607 1.35848784018  
H 0.883056024321 -1.76283112263 1.42152122382  
H 1.98700707921 -1.40838429497 0.413981932003  
O -2.31576361507 -0.152161413299 1.25703925349  
H -3.14787224055 0.0115259283642 1.70329279532  
H -1.76855977549 0.678653068469 1.36990820607  
O 1.66415663864 1.21932807468 1.67708251707



|   |                    |                  |                 |
|---|--------------------|------------------|-----------------|
| H | 1.69501152689      | 0.22471780342    | 1.62689913853   |
| H | 2.29885848428      | 1.480527248      | 2.34465546867   |
| O | 2.05553942977      | -1.01547237817   | -1.36304051433  |
| H | 1.97721657597      | -0.0232968652168 | -1.32734021811  |
| H | 2.81972137334      | -1.21024778461   | -1.9059363719   |
| O | 1.86755697058      | 1.56082730517    | -1.07012502147  |
| H | 0.966853805132     | 1.86072013507    | -1.28970628174  |
| H | 1.91324535184      | 1.62958645215    | -0.102525288322 |
| O | -2.07800279215     | -0.0191239847135 | -1.56421376894  |
| H | -2.36940060924     | -0.160982444156  | -0.65135902534  |
| H | -1.49411323095     | -0.787603919374  | -1.74207555598  |
| O | -0.765179898359    | 2.19883402485    | -1.34369372442  |
| H | -1.14310672039     | 2.85562540923    | -1.92879723686  |
| H | -1.26380858081     | 1.3492439109     | -1.50371897263  |
| O | -0.923280792683    | 2.0100619437     | 1.40499510393   |
| H | -0.000391985469245 | 1.799684217      | 1.63705815974   |
| H | -0.88025306128     | 2.28941902312    | 0.47480960141   |
| O | -0.431194827639    | -2.15105598676   | -1.62596938578  |
| H | 0.474155852145     | -1.79700142427   | -1.66132649704  |
| H | -0.544798481692    | -2.41713915834   | -0.701790997279 |

## References

- <sup>1</sup>P. Tosco, N. Stiefl, and G. Landrum, *J. Cheminform.* **6**, 37 (2014).
- <sup>2</sup>“Nist precomputed vibrational scaling factors,” <http://cccbdb.nist.gov/vibscale.asp>, accessed: 2017-12-23.
- <sup>3</sup>E. E. Dahlke, R. M. Olson, H. R. Leverentz, and D. G. Truhlar, *The Journal of Physical Chemistry A* **112**, 3976 (2008).
